# Supplementary material
Source: Springer Nature journal article supplement (https://www.springermedizin.de/resource/supplementary/12950_2013_360_MOESM7_ESM.pdf/9557658)

**C**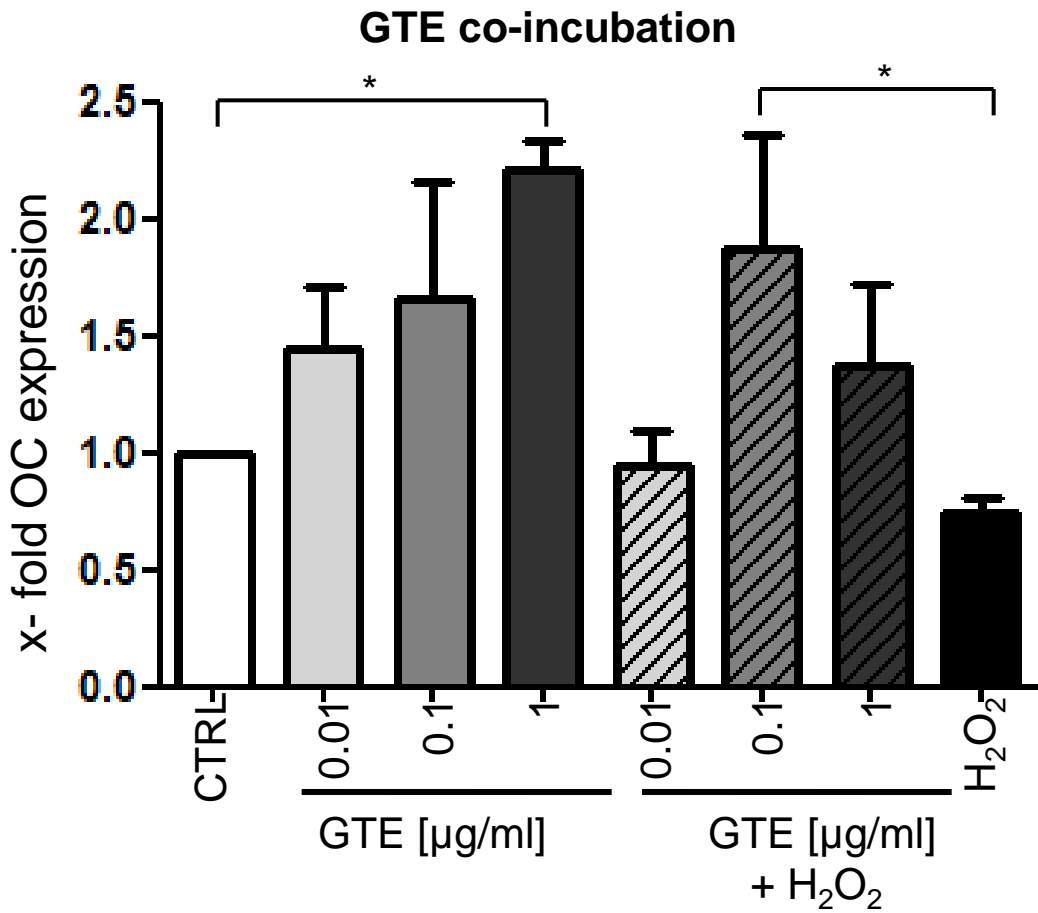**D**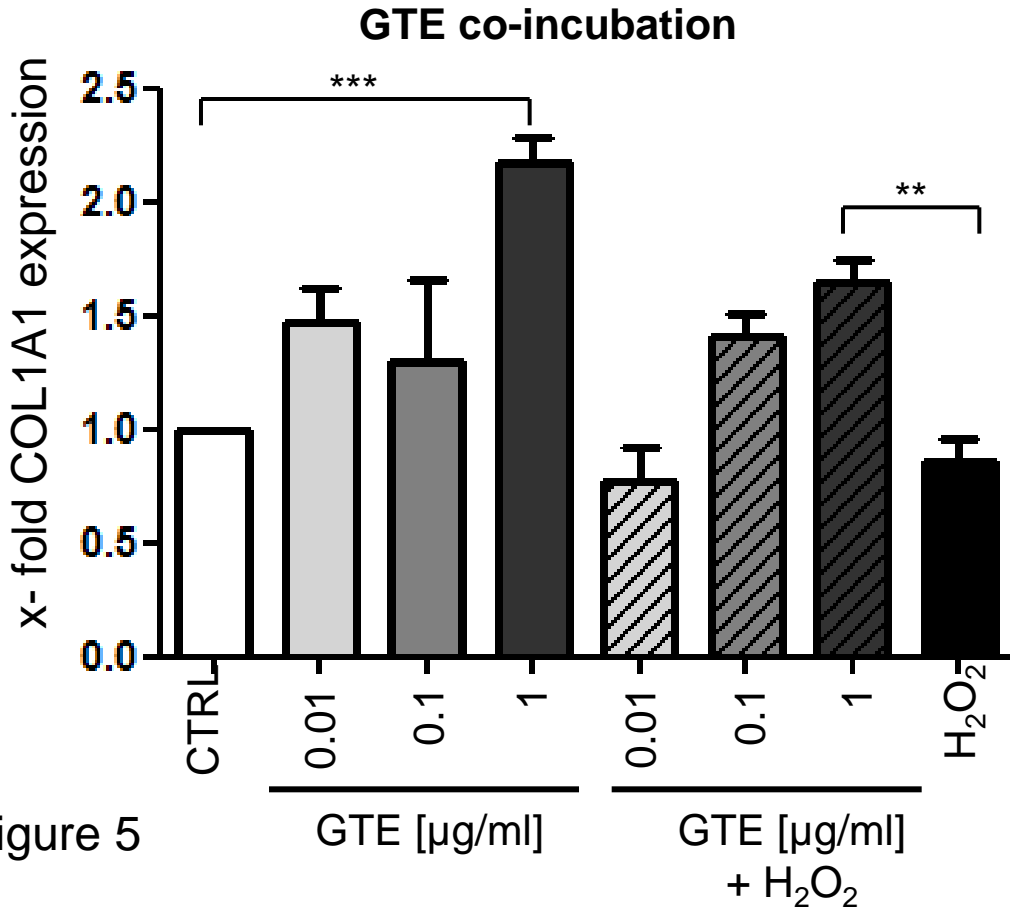

Figure 5

Supplement: MOESM7 [file 9557658]
